# Supplementary material for: Spectroscopic characterization of the oxo-transfer reaction from a bis(μ-oxo)dicopper(iii) complex to triphenylphosphine
Source: Royal Society of Chemistry journal article supplement (doi:10.1039/b406692h), 2004-01-01
Supplement: b406692h.pdf [file b406692h.pdf]

## Supporting Information

### Spectroscopic Characterization of the Oxo-Transfer Reaction from a Bis( $\mu$ -oxo)dicopper(III) Complex to Triphenylphosphine

Svetlana V. Pavlova,<sup>a</sup> Kelvin H.-C. Chen<sup>a,b</sup> and Sunney I. Chan<sup>a,b\*</sup>

<sup>a</sup> *Institute of Chemistry, Academia Sinica, Taipei 115, Taiwan. Fax: 886-2-2783-1237;*

*Tel: 886-2-2789-8654; E-mail: [chans@chem.sinica.edu.tw](mailto:chans@chem.sinica.edu.tw).*

<sup>b</sup> *Department of Chemistry, National Tsing Hua University, Hsinchu 300, Taiwan.*

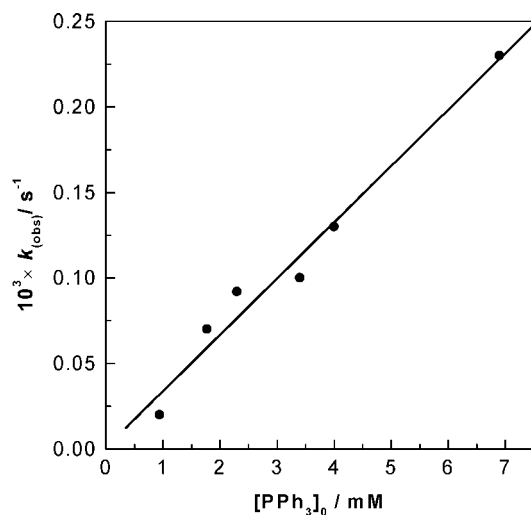

**Fig. S1** Plot of the pseudo-first-order rate constant  $k_{(obs)}$  obtained from analysis of initial rates as a function of  $[PPh_3]_0$  for the reaction of **1** with  $PPh_3$  in dichloromethane at 193 K under dioxygen.  $[1]_0 = 0.045$  mM,  $[O_2]_0 = 6.58$  mM.

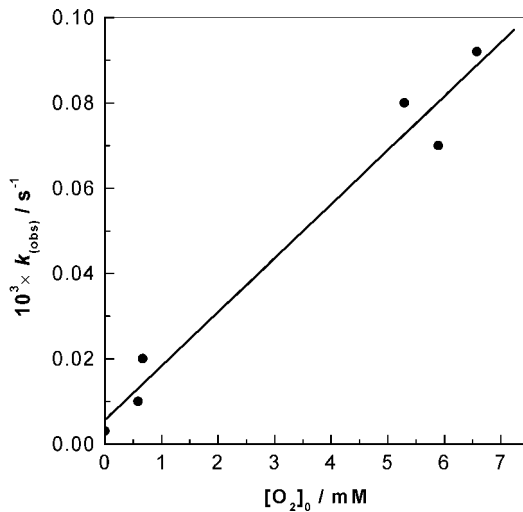

**Fig. S2** Plot of the pseudo-first-order rate constant  $k_{(obs)}$  obtained from analysis of initial rates as a function of  $[O_2]_0$  for the reaction of **1** with  $PPh_3$  in dichloromethane at 193 K.  $[1]_0 = 0.045$  mM,  $[PPh_3]_0 = 2.3$  mM.

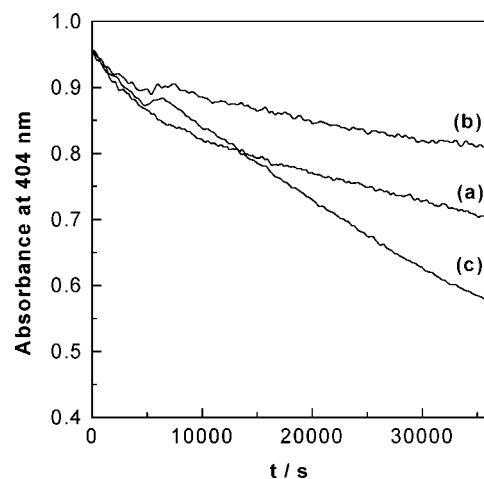

**Fig. S3** Kinetic traces of the absorbance change at 404 nm during the reaction of **1** with PPh<sub>3</sub> in dichloromethane at 193 K under dioxygen without addition of the O=PPh<sub>3</sub> (**a**); and with addition of the O=PPh<sub>3</sub> to the reaction mixture at reaction time 5400 s (**b**, **c**). [1]<sub>0</sub> = 0.04 mM, [PPh<sub>3</sub>]<sub>0</sub> = 3.4 mM, O=PPh<sub>3</sub> = 1.5 mM (**b**) and 3.4 mM (**c**), [O<sub>2</sub>]<sub>0</sub> = 6.58 mM.
